# Supplementary material for: The potential therapeutic effect of melatonin on human ovarian cancer by inhibition of invasion and migration of cancer stem cells
Source: Springer Nature journal article supplement (doi:10.1038/s41598-017-16940-y), 2017-11-30
Supplement: 41598_2017_16940_MOESM1_ESM.pdf [file 41598_2017_16940_MOESM1_ESM.pdf]

# The potential therapeutic effect of melatonin on human ovarian cancer by inhibition of invasion and migration of cancer stem cells

Maryam Akbarzadeh <sup>1, 2</sup>. Ali Akbar Movassaghpour<sup>3</sup>. Hossein Ghanbari<sup>4</sup>.

Maryam Kheirandish<sup>5</sup>. Nazila Fathi Maroufi <sup>6</sup>. Reza Rahbarghazi <sup>7</sup>.

Mohammad Nouri <sup>2, 1\*</sup> and Nasser Samadi <sup>2, 6\*</sup>

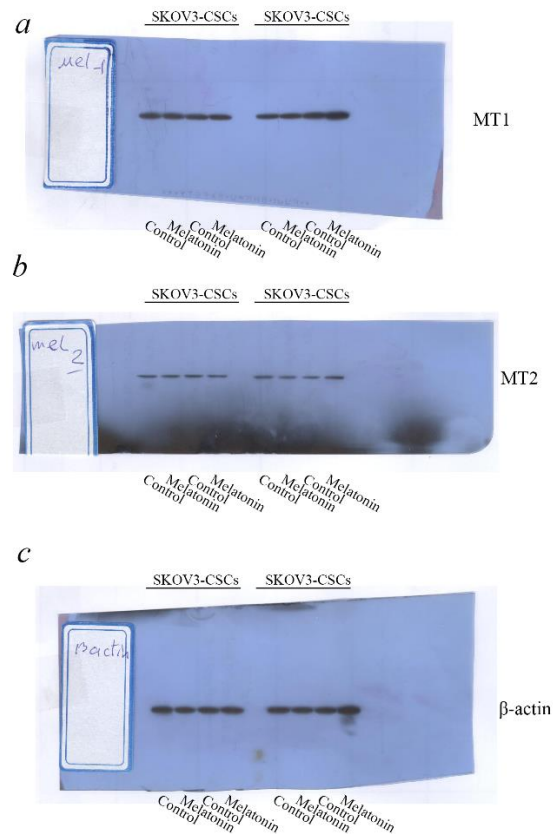

**Figure 1.** SKOV3 and isolated CSCs were treated with the 3.4 mM melatonin for 48 hr. The cell lysates were prepared and used for Western blot with MT1, MT2 and b-actin antibodies. The figure shows (a) melatonin receptor 1, (b) melatonin receptor 2 (c) beta actin in both SKOV3 and cancer stem cells. The experiment was repeated twice and the gel was not cropped.

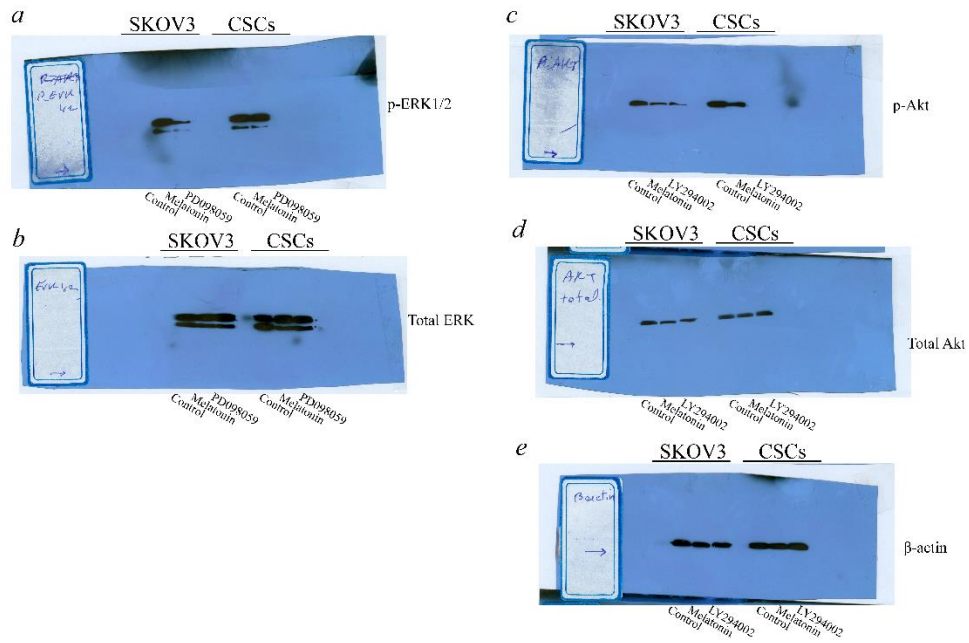

**Figure 2.** SKOV3 and isolated CSCs were treated with the 3.4 mM melatonin for 48 hr. The cell lysates were prepared and used for Western blot with (a) p-ERK1/2, (b) total ERK, (c) p-Akt, (d) total Akt and (e) b-actin antibodies in both SKOV3 and cancer stem cells. the gel was not cropped.
